# Supplementary material for: Design and Synthesis of New Acridone-Based Nitric Oxide Fluorescent Probe
Source: MDPI journal article supplement (doi:10.3390/molecules26144340), 2021-07-17
Supplement: s1 [file s1]

## Supplementary materials

### Design and synthesis of new acridone-based nitric oxide fluorescent probe

**Mikhail Panfilov**<sup>1</sup>, **Daria Chernova**<sup>2</sup>, **Irina Khalfina**<sup>1,2</sup>, **Alexander Moskalensky**<sup>2</sup> and **Alexey Vorob'ev**<sup>1,2\*</sup>

<sup>1</sup> Novosibirsk Institute of Organic Chemistry, Russian Federation, 630090, Novosibirsk, 9 Lavrentiev avenue; e-mail@e-mail.com

<sup>2</sup> Affiliation 2; e-mail@e-mail.com

\* Correspondence: vor@nioch.nsc.ru; Tel.: +7 952 9488714

|                                                 |    |
|-------------------------------------------------|----|
| <sup>1</sup> H spectrum of compound <b>1</b>    | 2  |
| <sup>1</sup> H spectrum of compound <b>2</b>    | 3  |
| <sup>13</sup> C spectrum of compound <b>2</b>   | 4  |
| <sup>1</sup> H spectrum of compound <b>3</b>    | 5  |
| <sup>13</sup> C spectrum of compound <b>3</b>   | 6  |
| <sup>1</sup> H spectrum of compound <b>4</b>    | 7  |
| <sup>13</sup> C spectrum of compound <b>4</b>   | 8  |
| <sup>1</sup> H spectrum of compound <b>5</b>    | 9  |
| <sup>13</sup> C spectrum of compound <b>5</b>   | 10 |
| <sup>1</sup> H spectrum of compound <b>6</b>    | 11 |
| <sup>13</sup> C spectrum of compound <b>6</b>   | 12 |
| <sup>1</sup> H spectrum of compound <b>8</b>    | 13 |
| <sup>13</sup> C spectrum of compound <b>8</b>   | 14 |
| <sup>1</sup> H spectrum of compound <b>9</b>    | 15 |
| <sup>1</sup> H spectrum of compound <b>10</b>   | 16 |
| <sup>1</sup> H spectrum of compound <b>11</b>   | 17 |
| <sup>1</sup> H spectrum of compound <b>12</b>   | 18 |
| <sup>13</sup> C spectrum of compound <b>12</b>  | 19 |
| <sup>1</sup> H spectrum of compound <b>13</b>   | 20 |
| <sup>13</sup> C spectrum of compound <b>13</b>  | 21 |
| <sup>1</sup> H spectrum of compound <b>14a</b>  | 22 |
| <sup>13</sup> C spectrum of compound <b>14a</b> | 23 |
| <sup>1</sup> H spectrum of compound <b>14b</b>  | 24 |

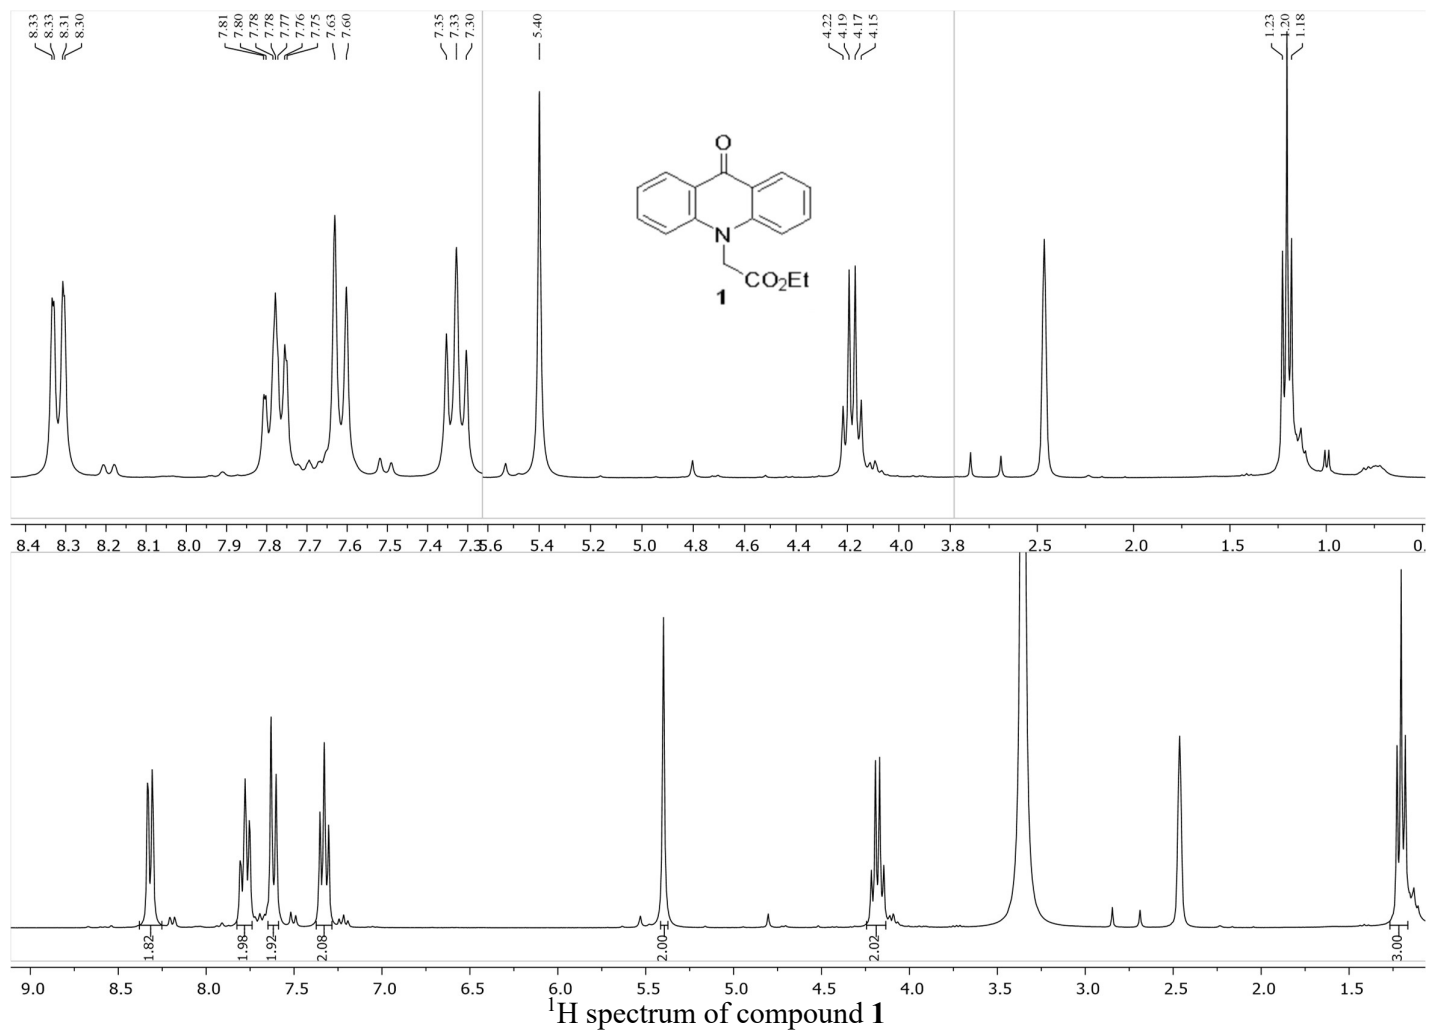

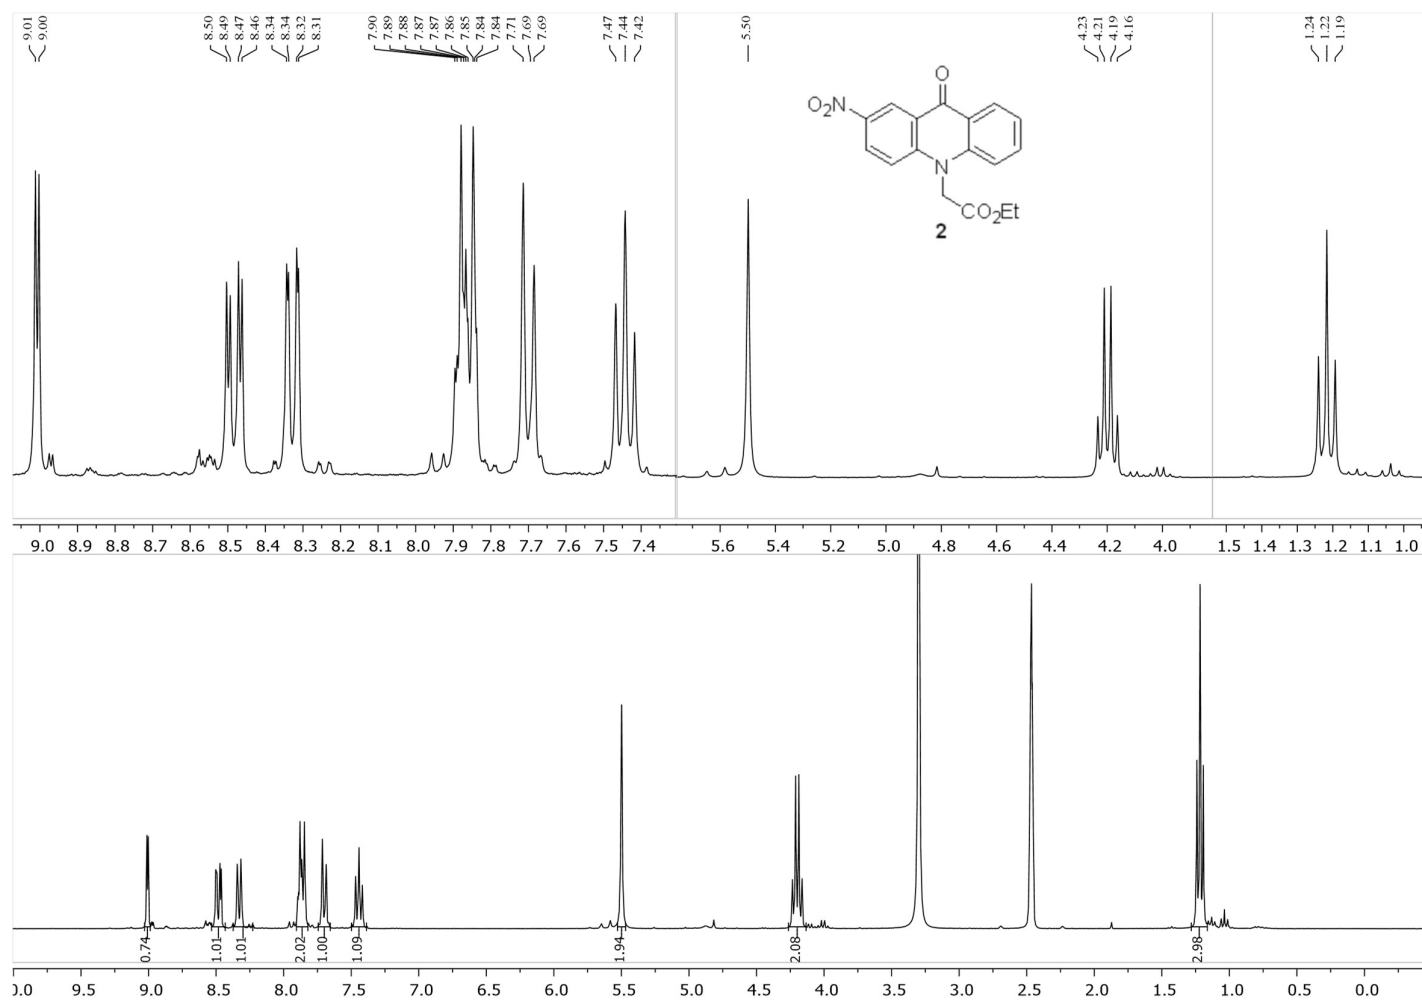

$^1\text{H}$  spectrum of compound **2**

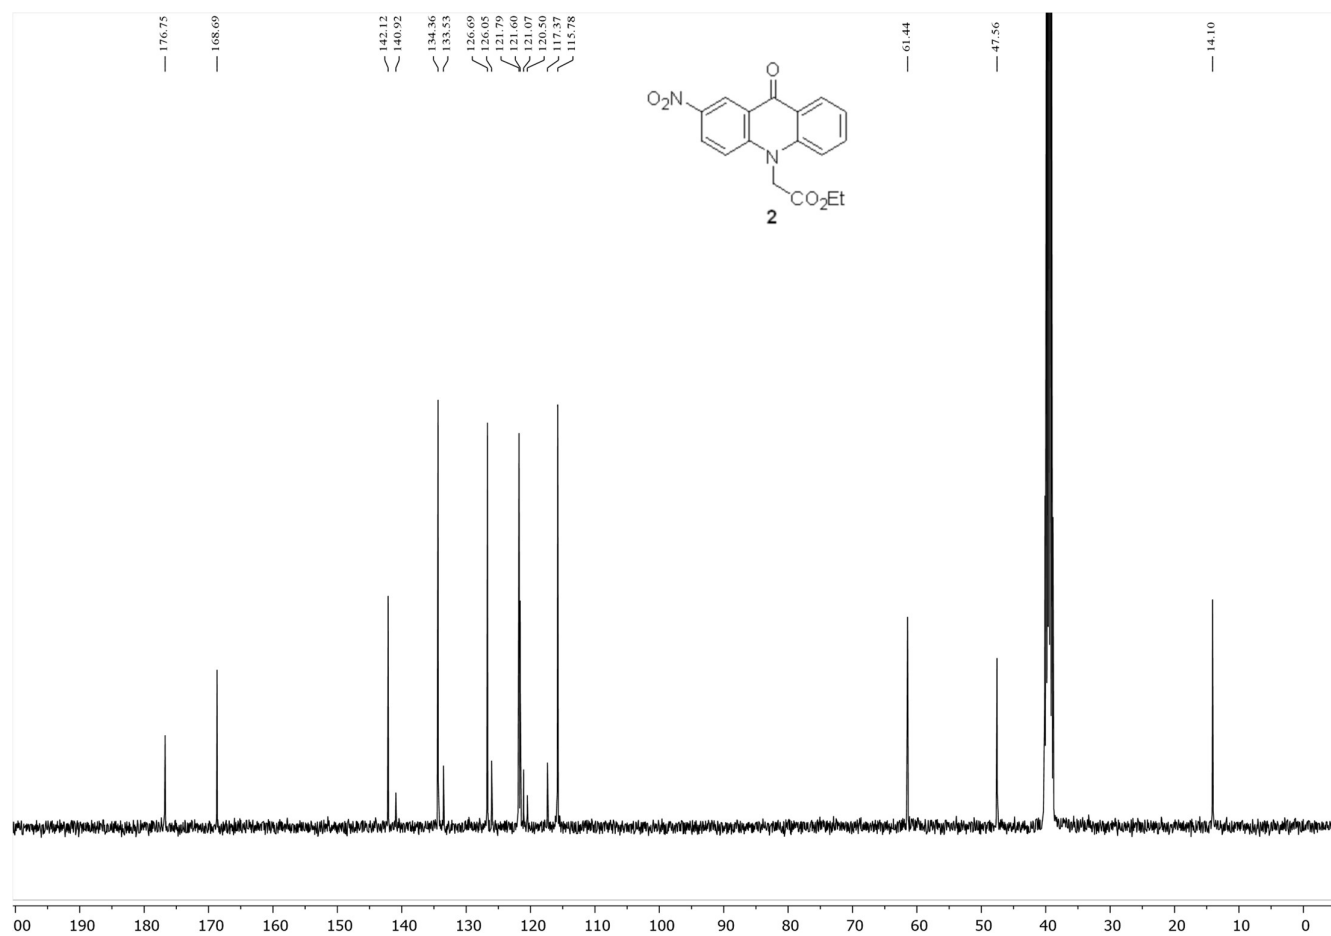

<sup>13</sup>C spectrum of compound **2**

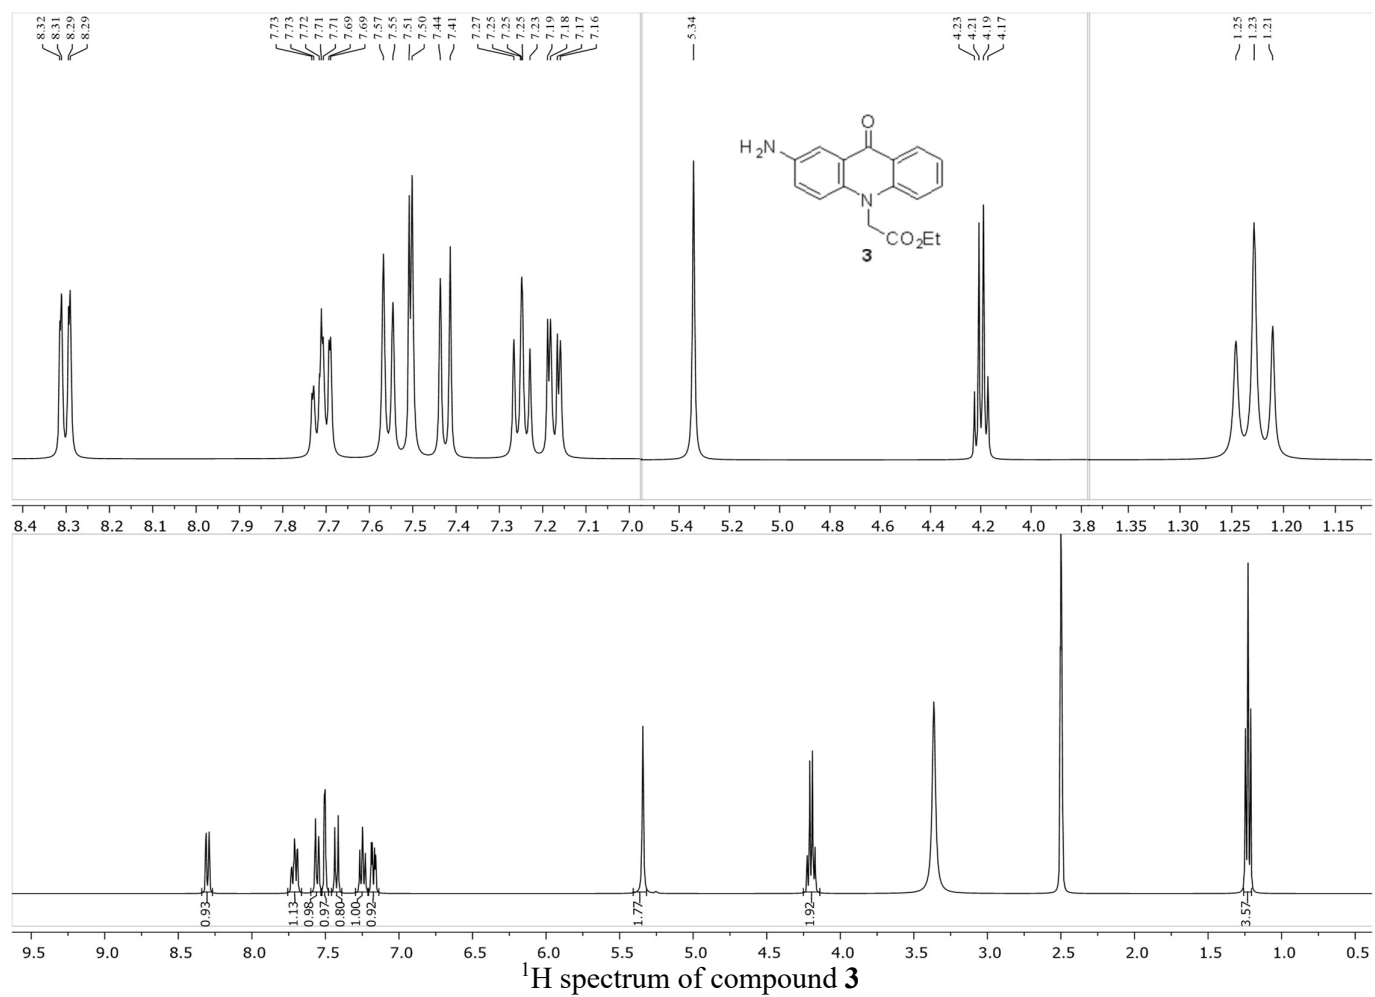

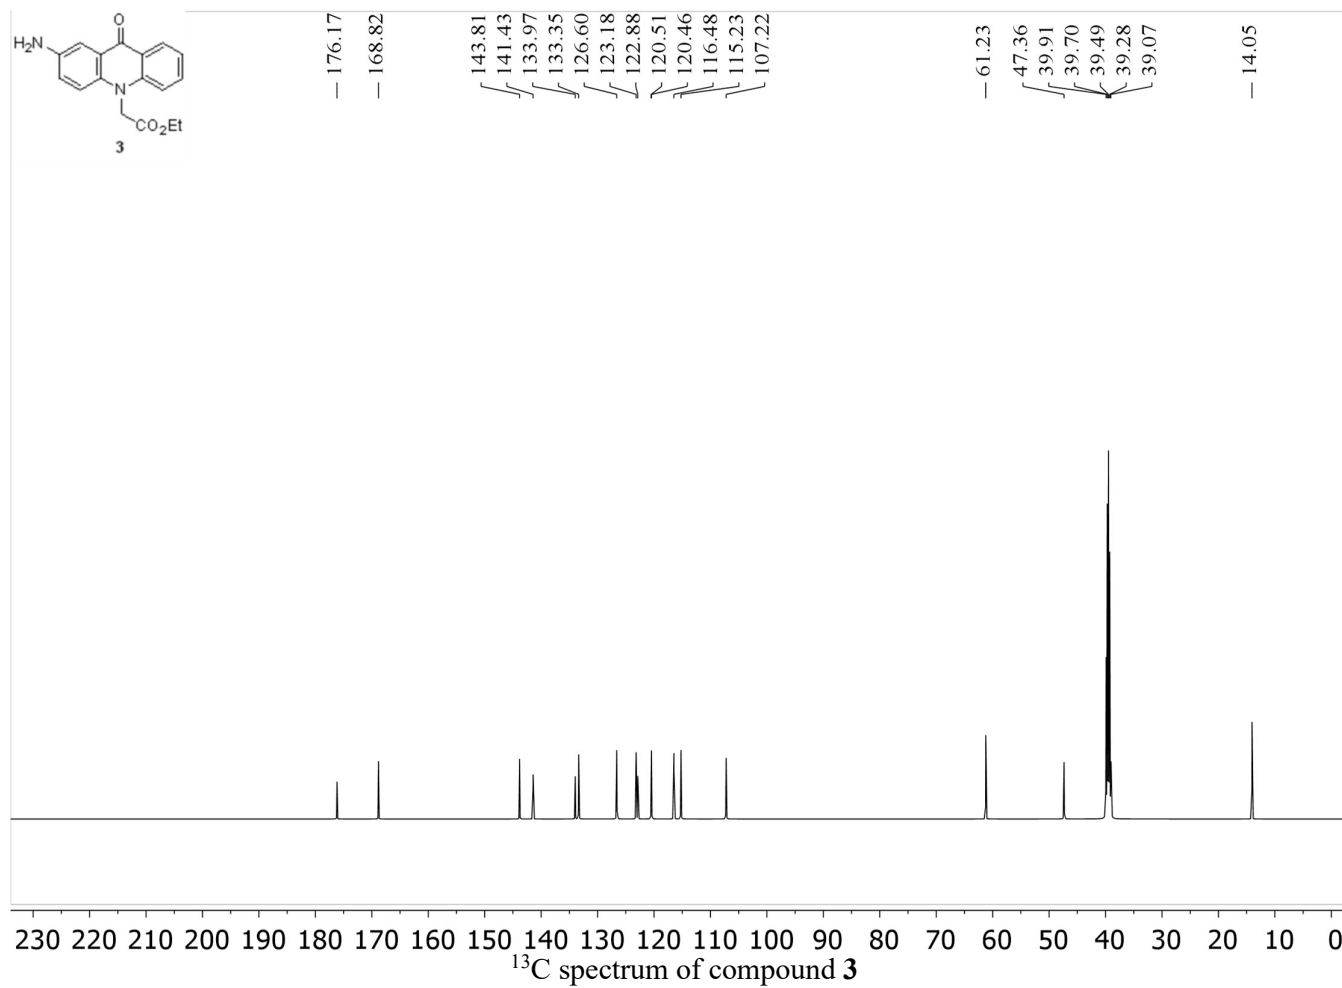

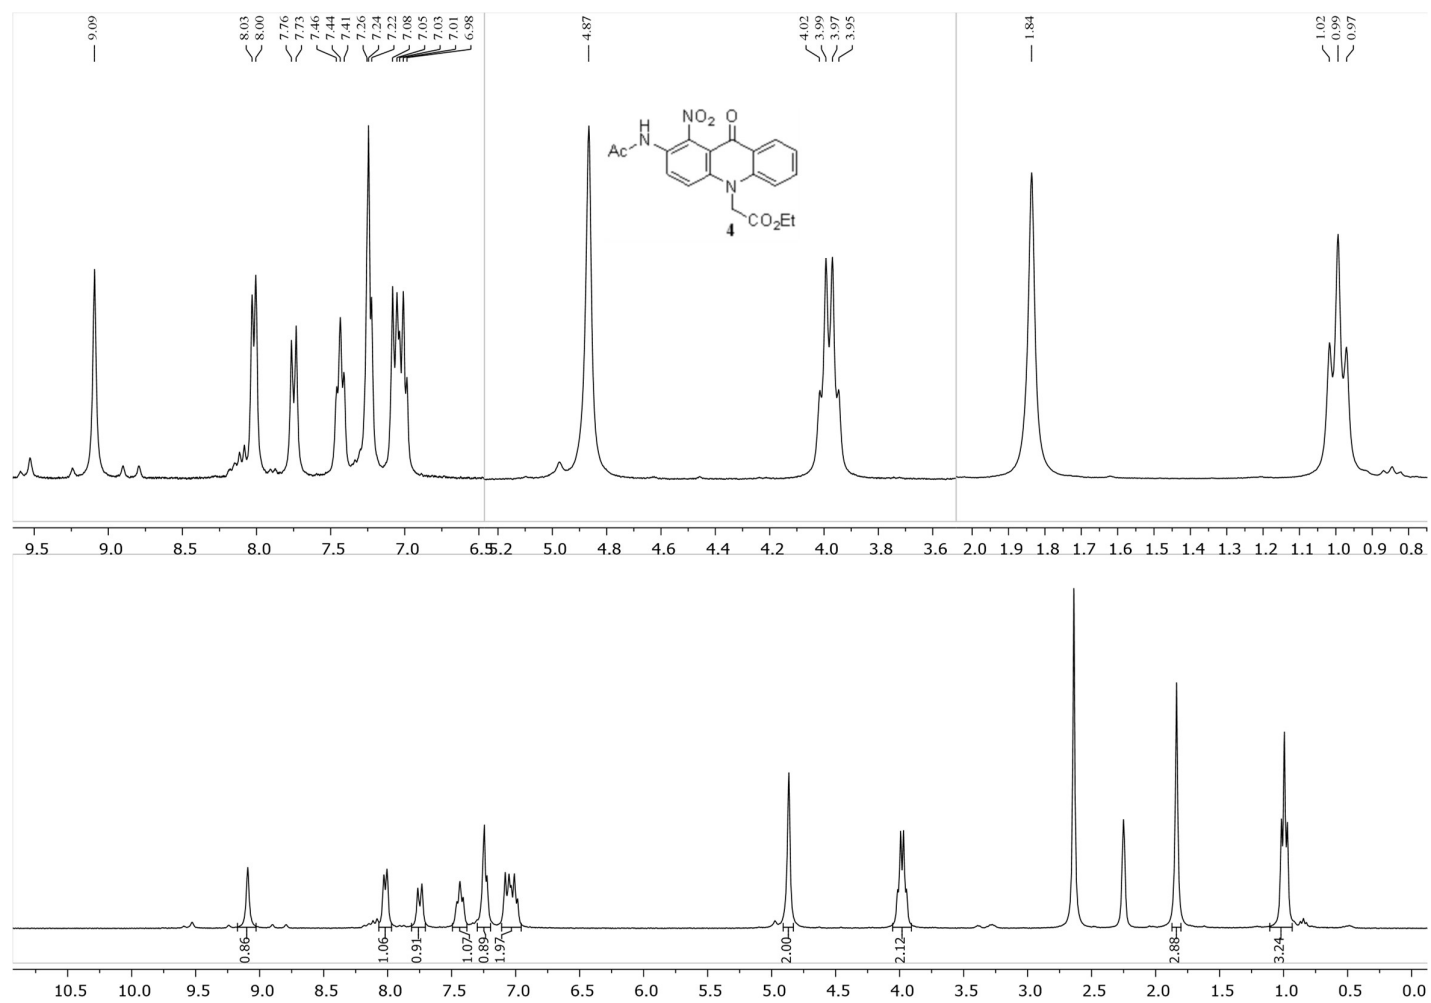

<sup>1</sup>H spectrum of compound 4

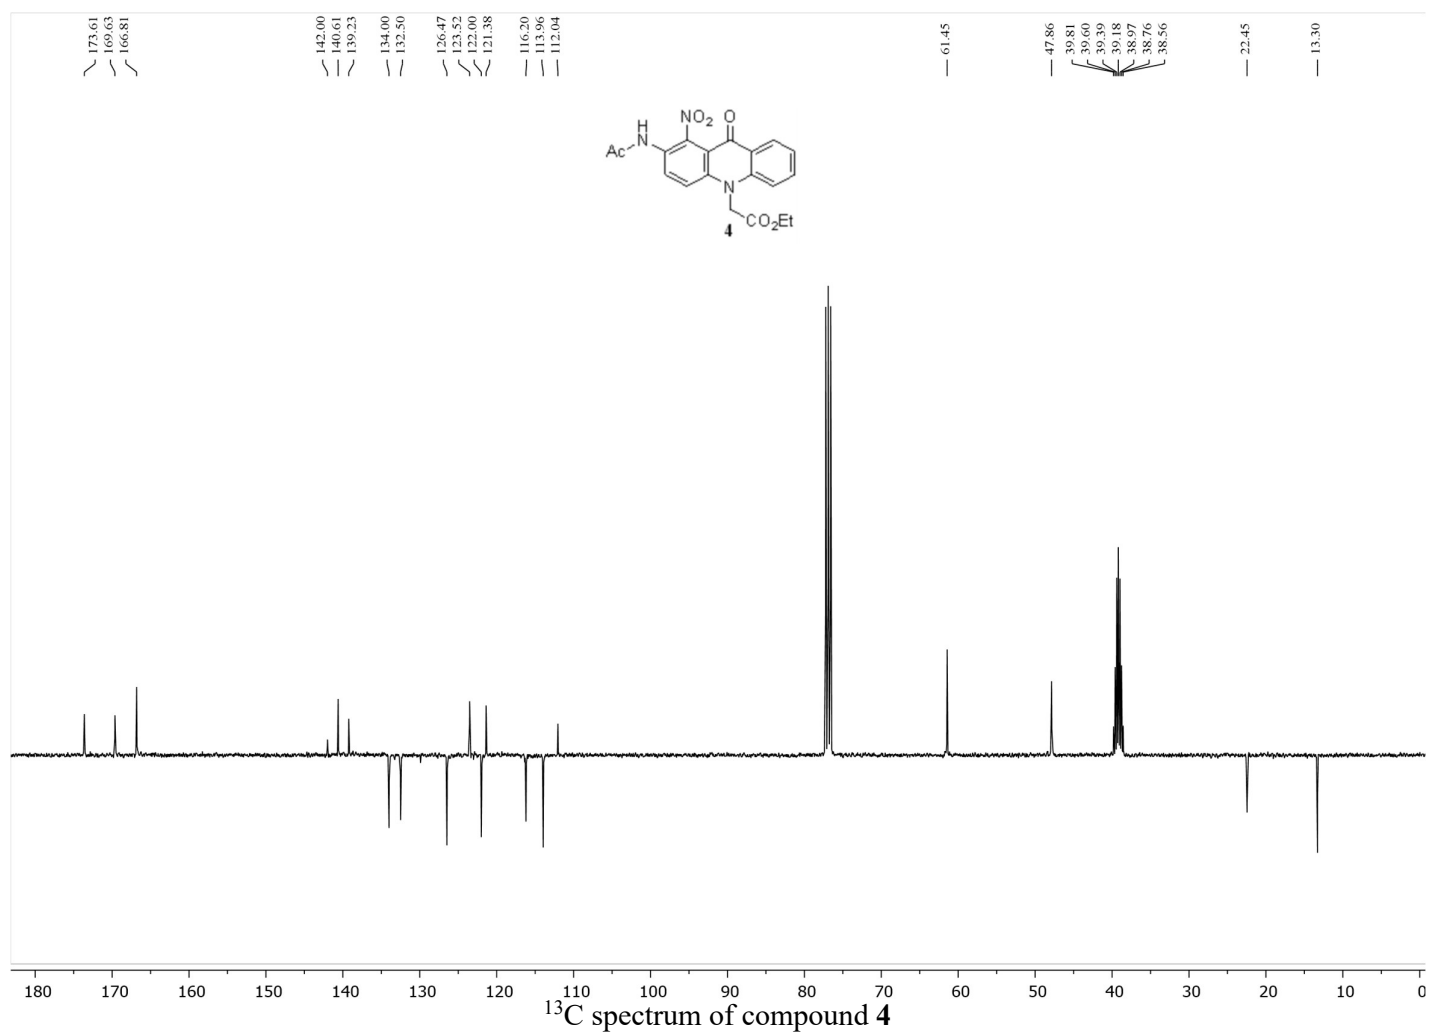



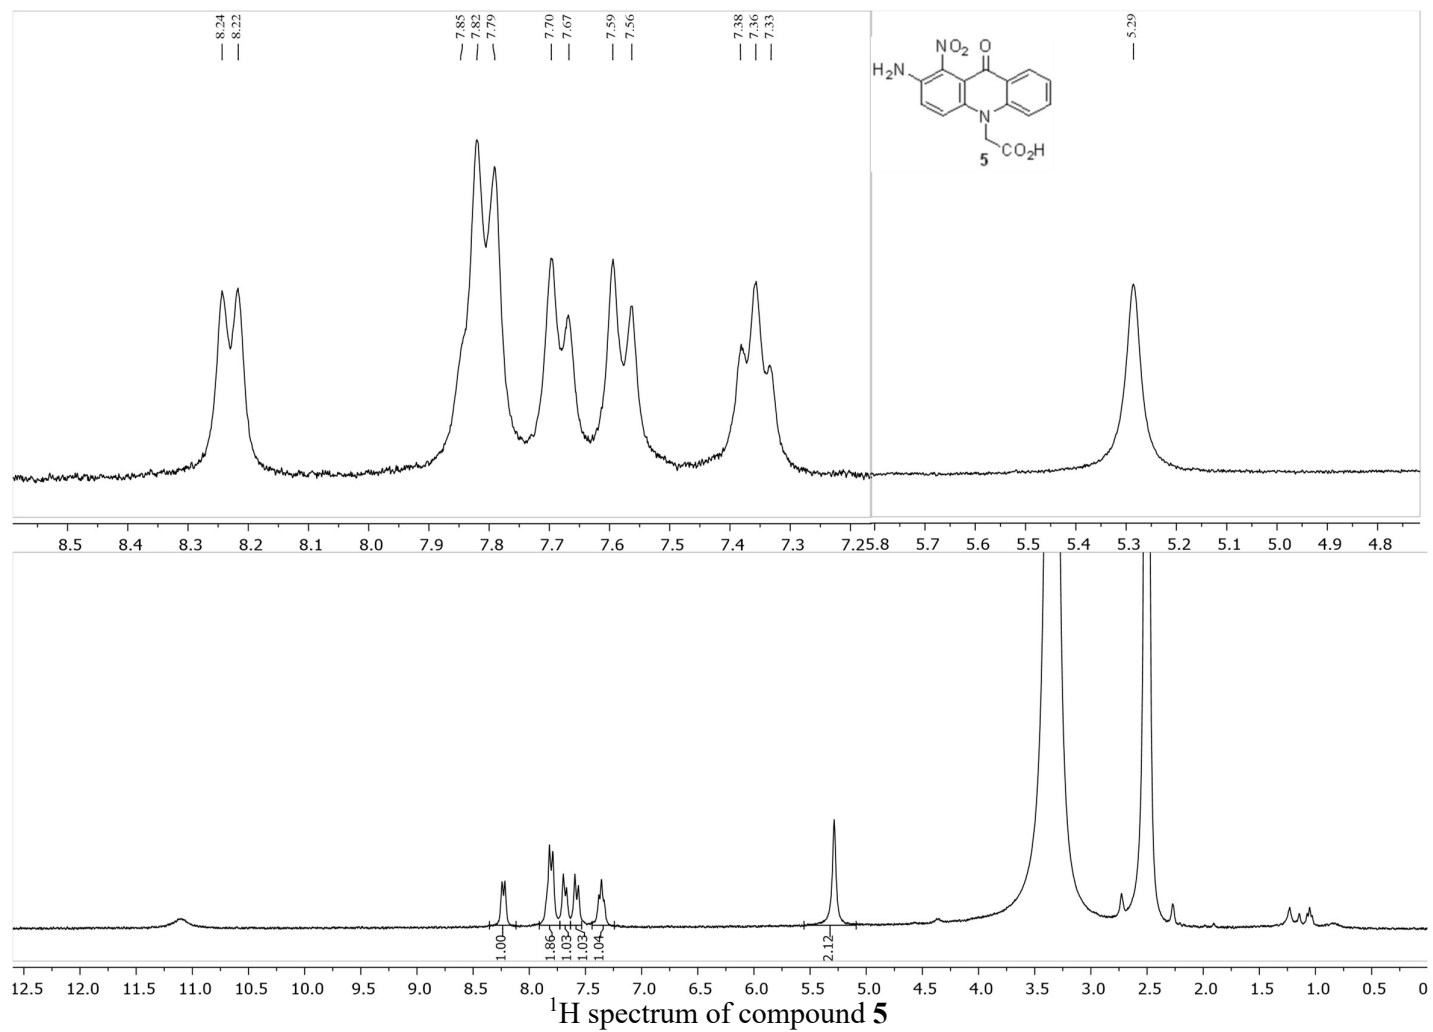

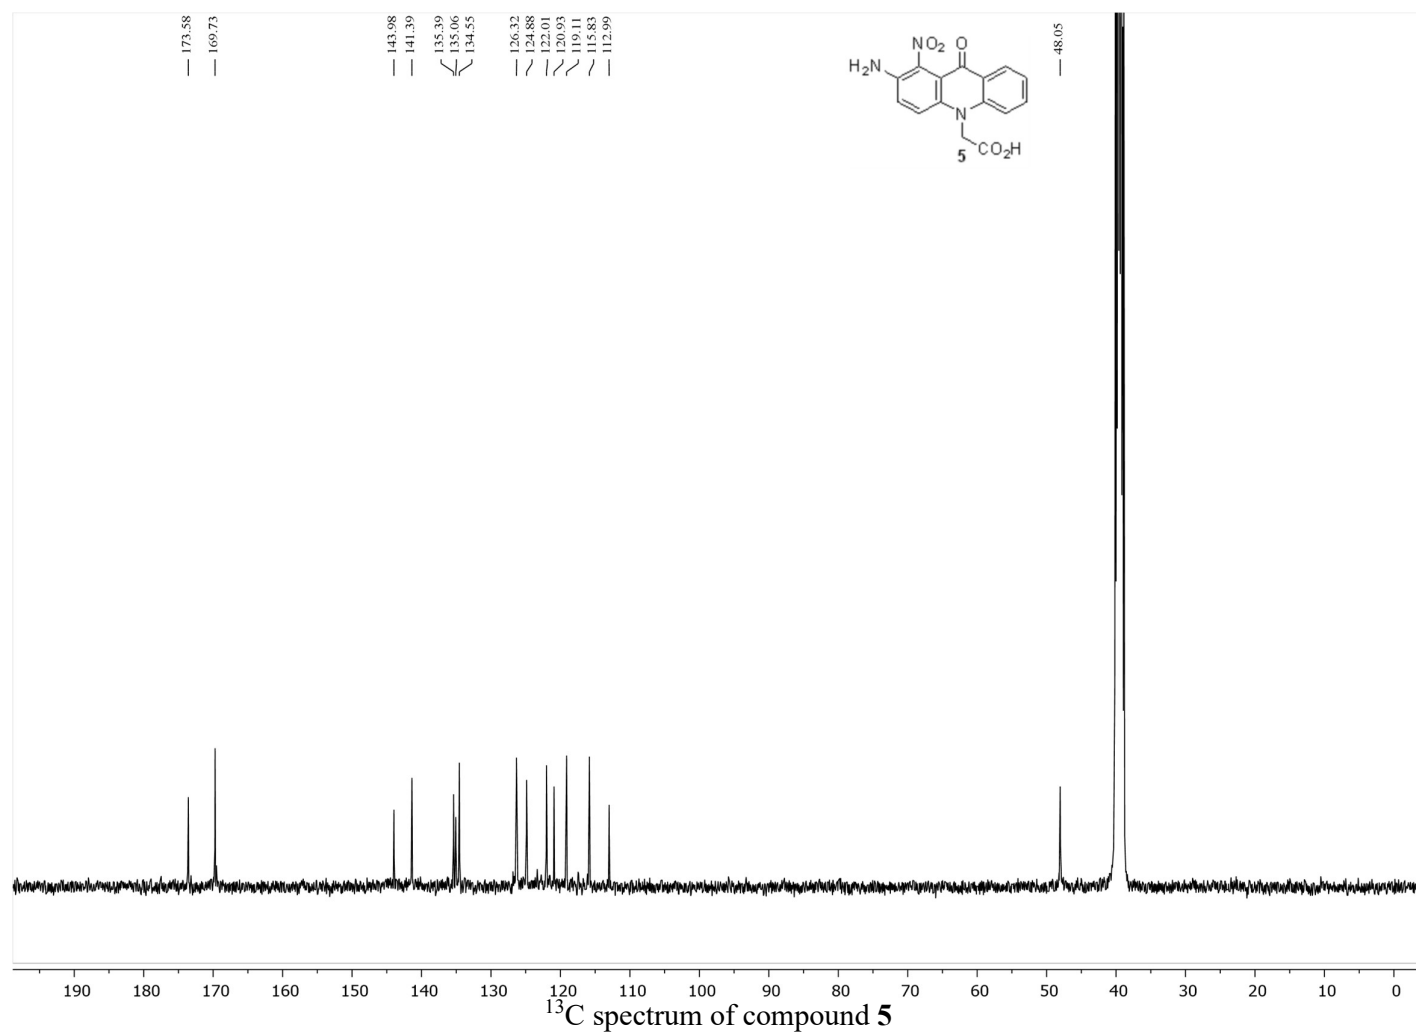

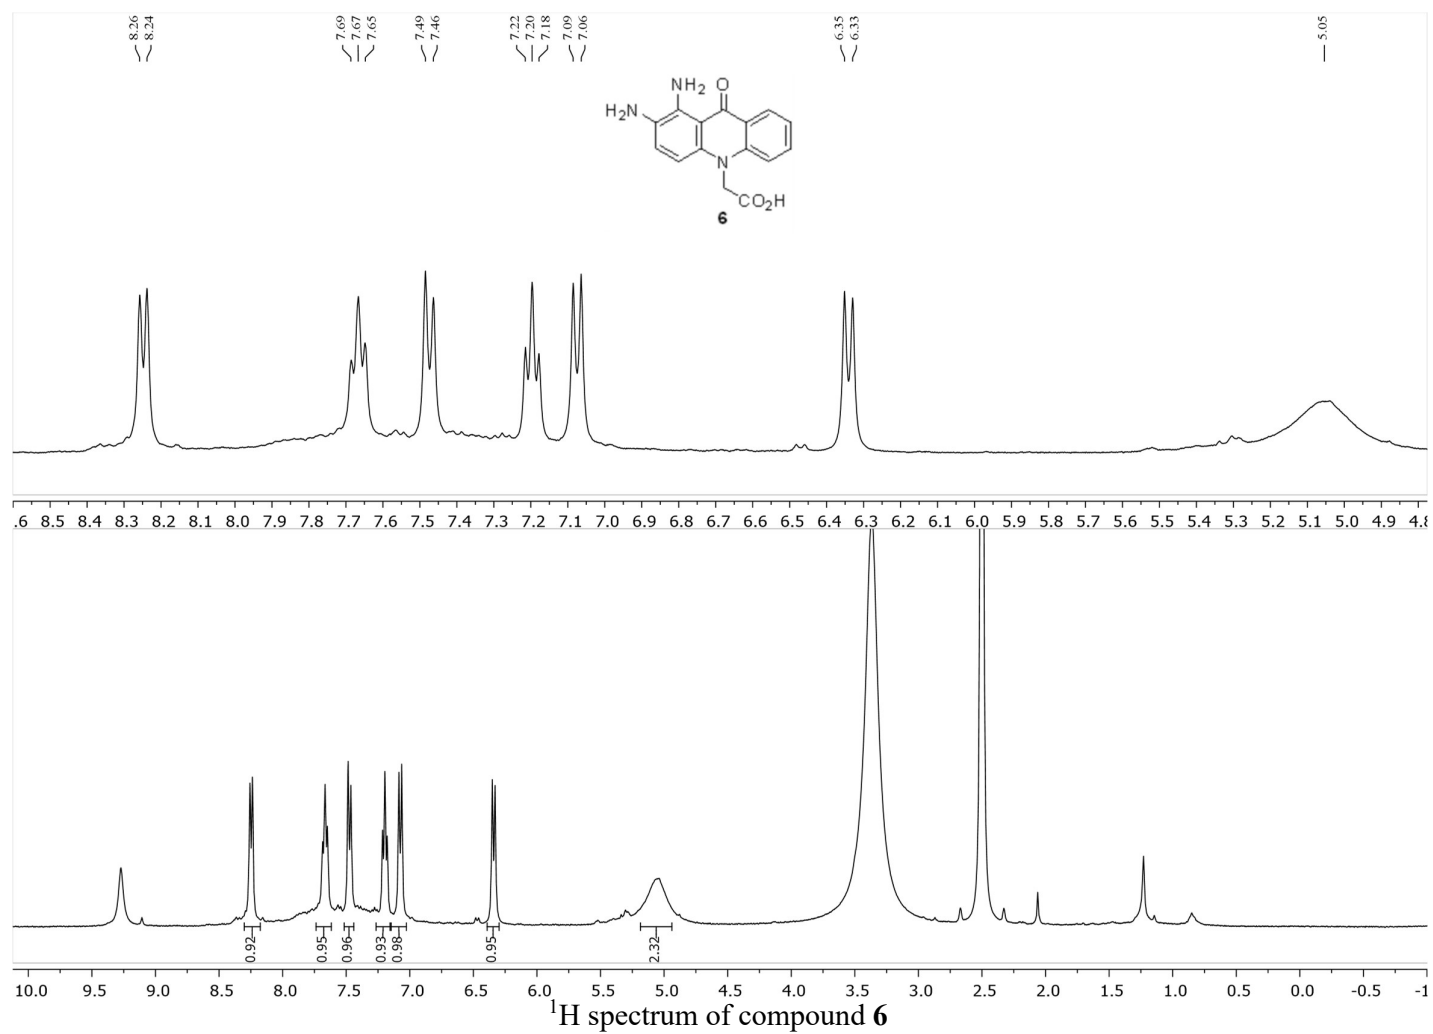

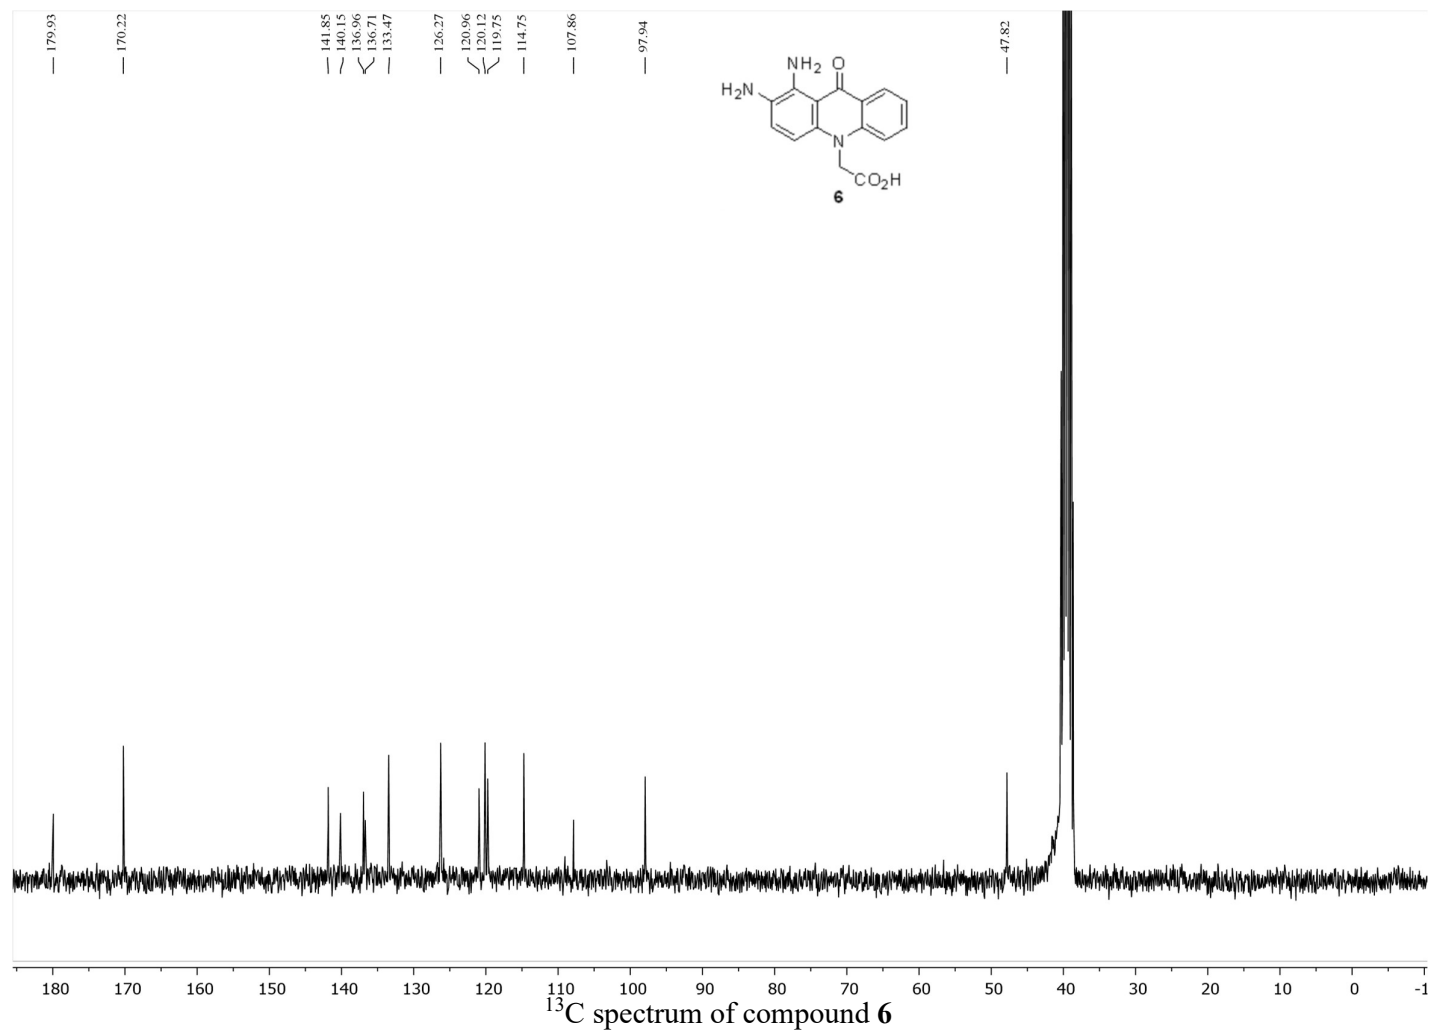

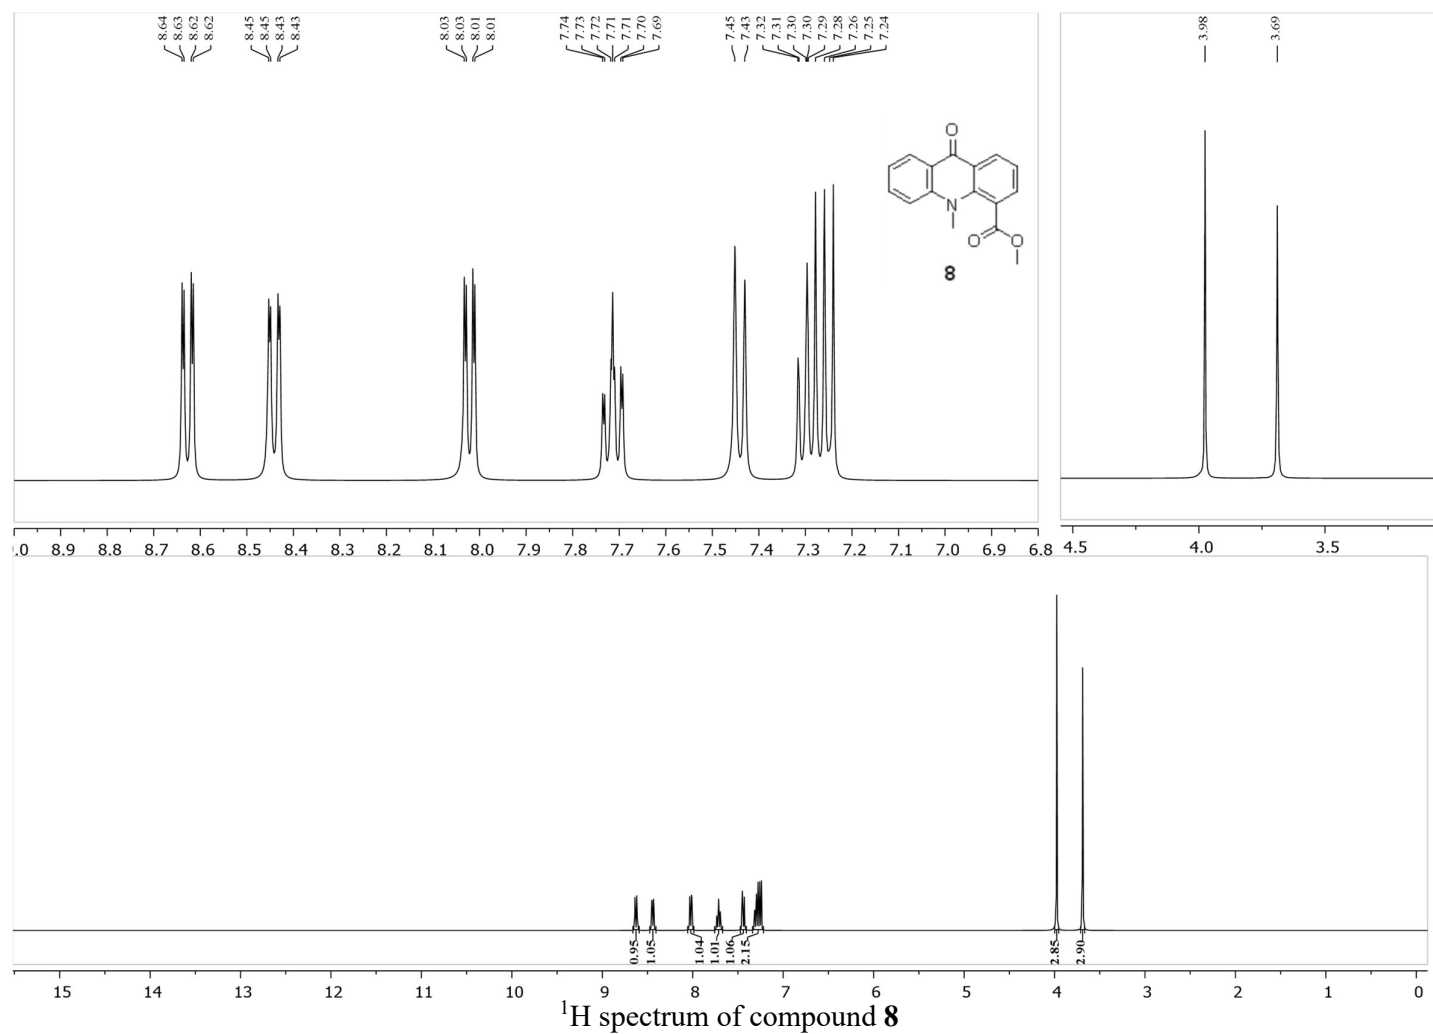

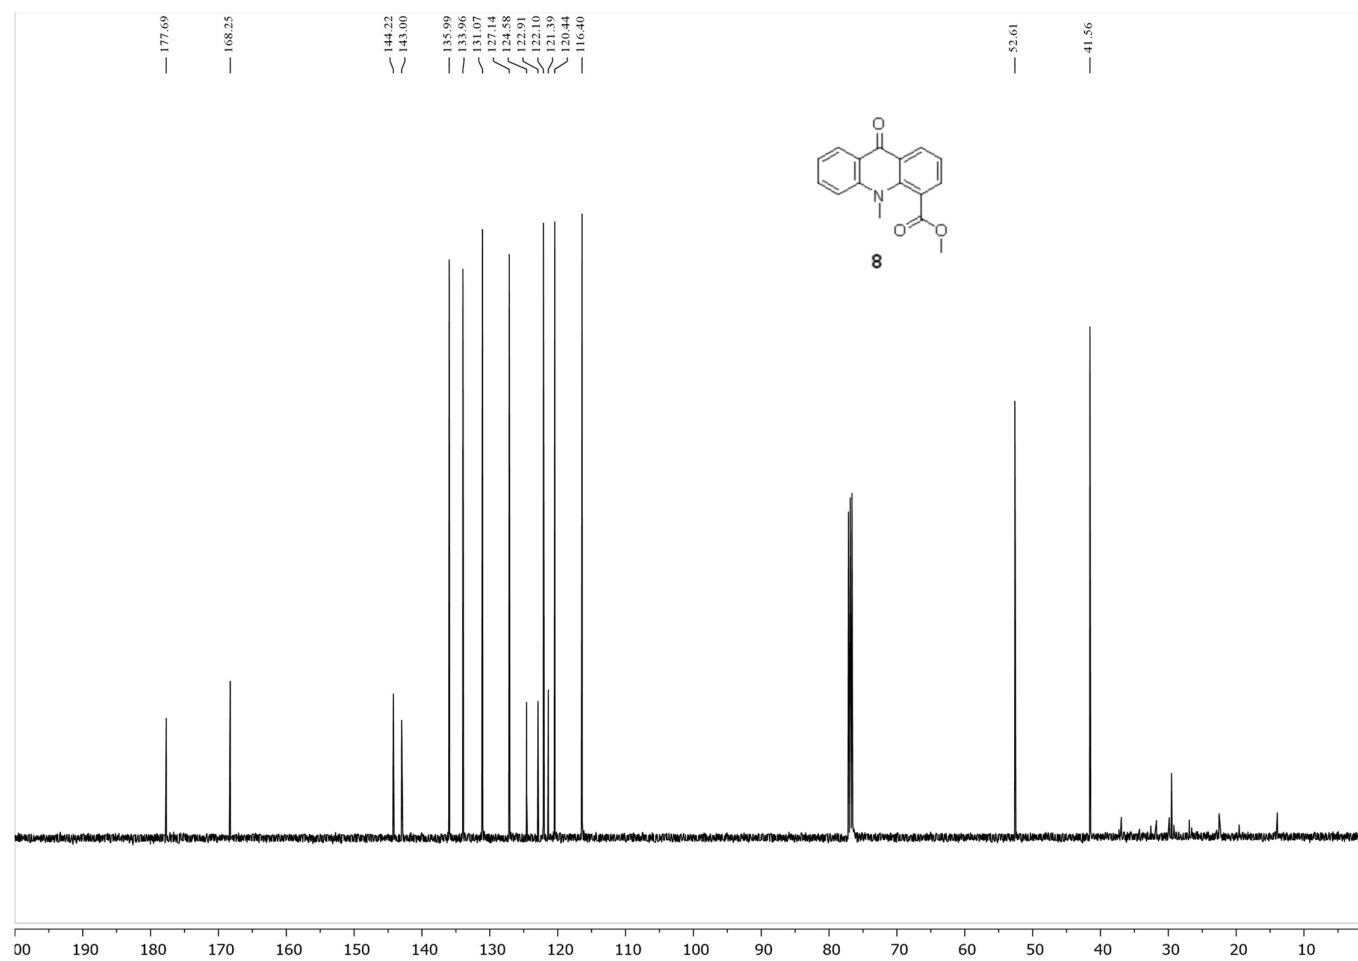

<sup>13</sup>C spectrum of compound **8**

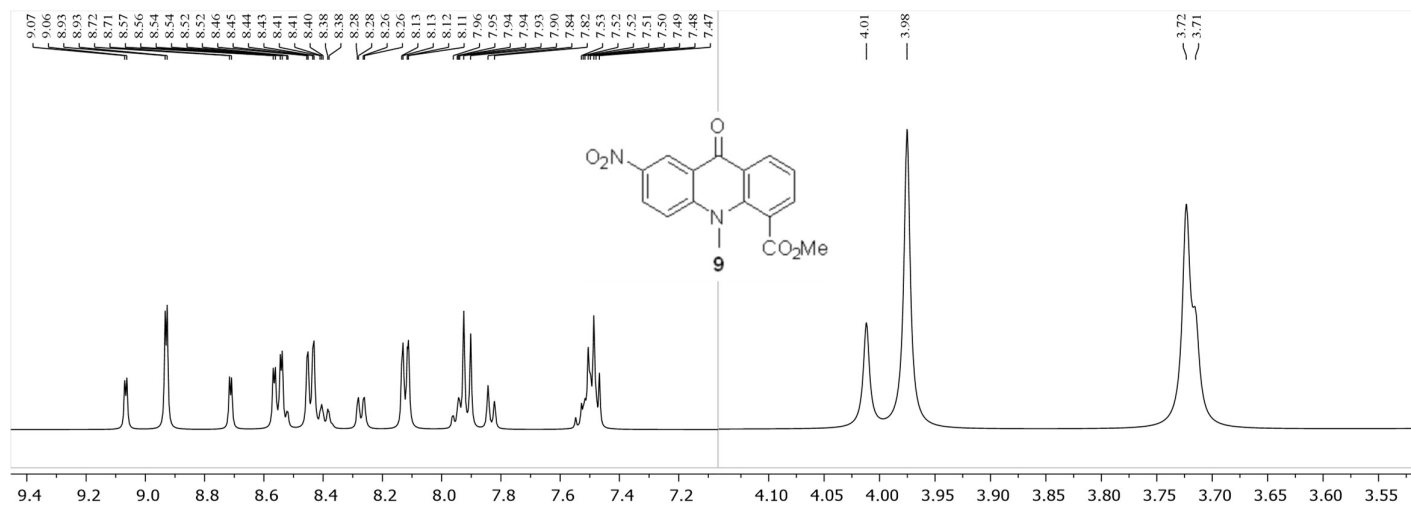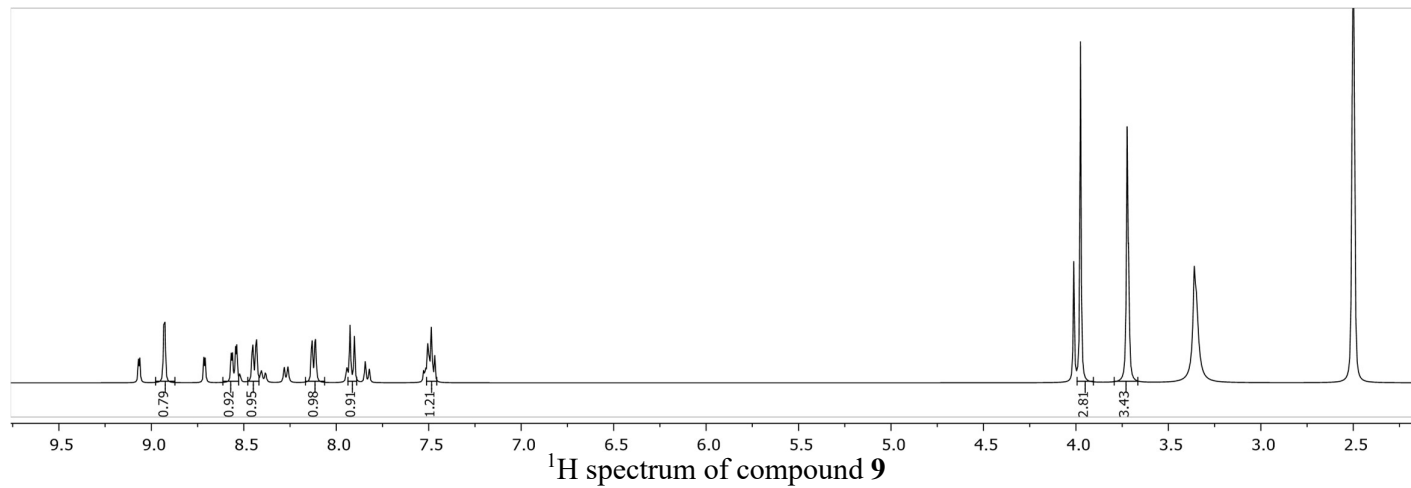

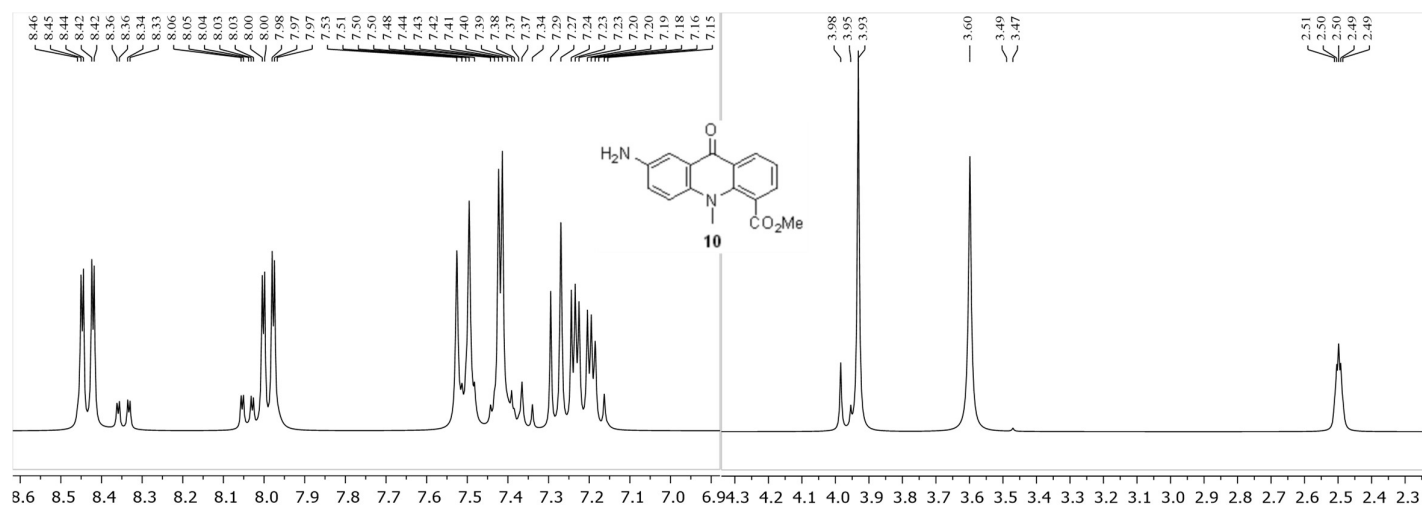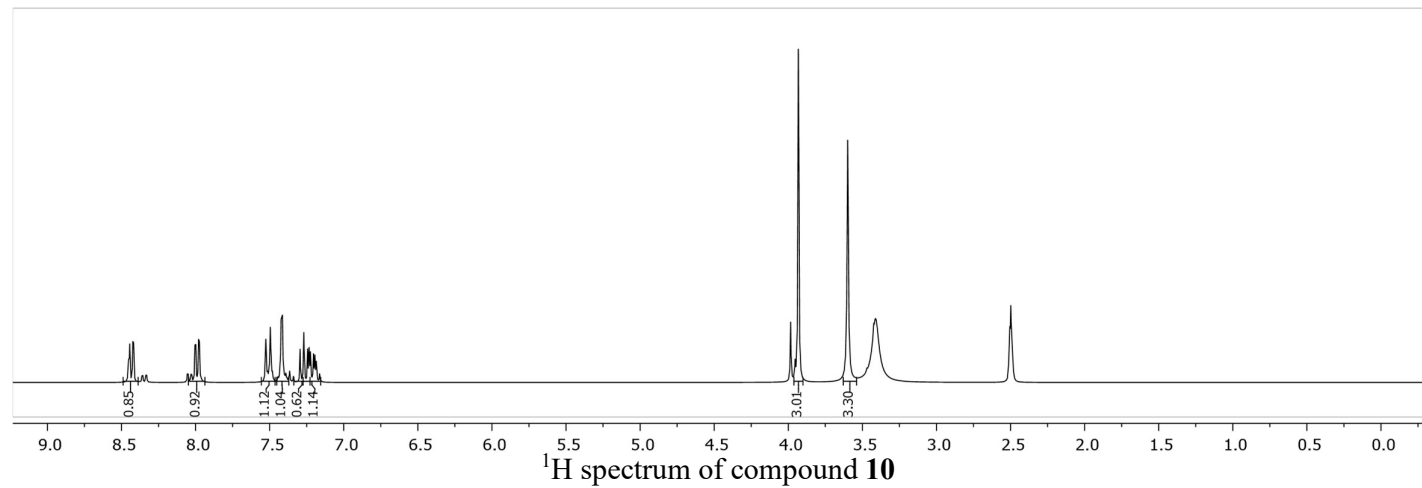



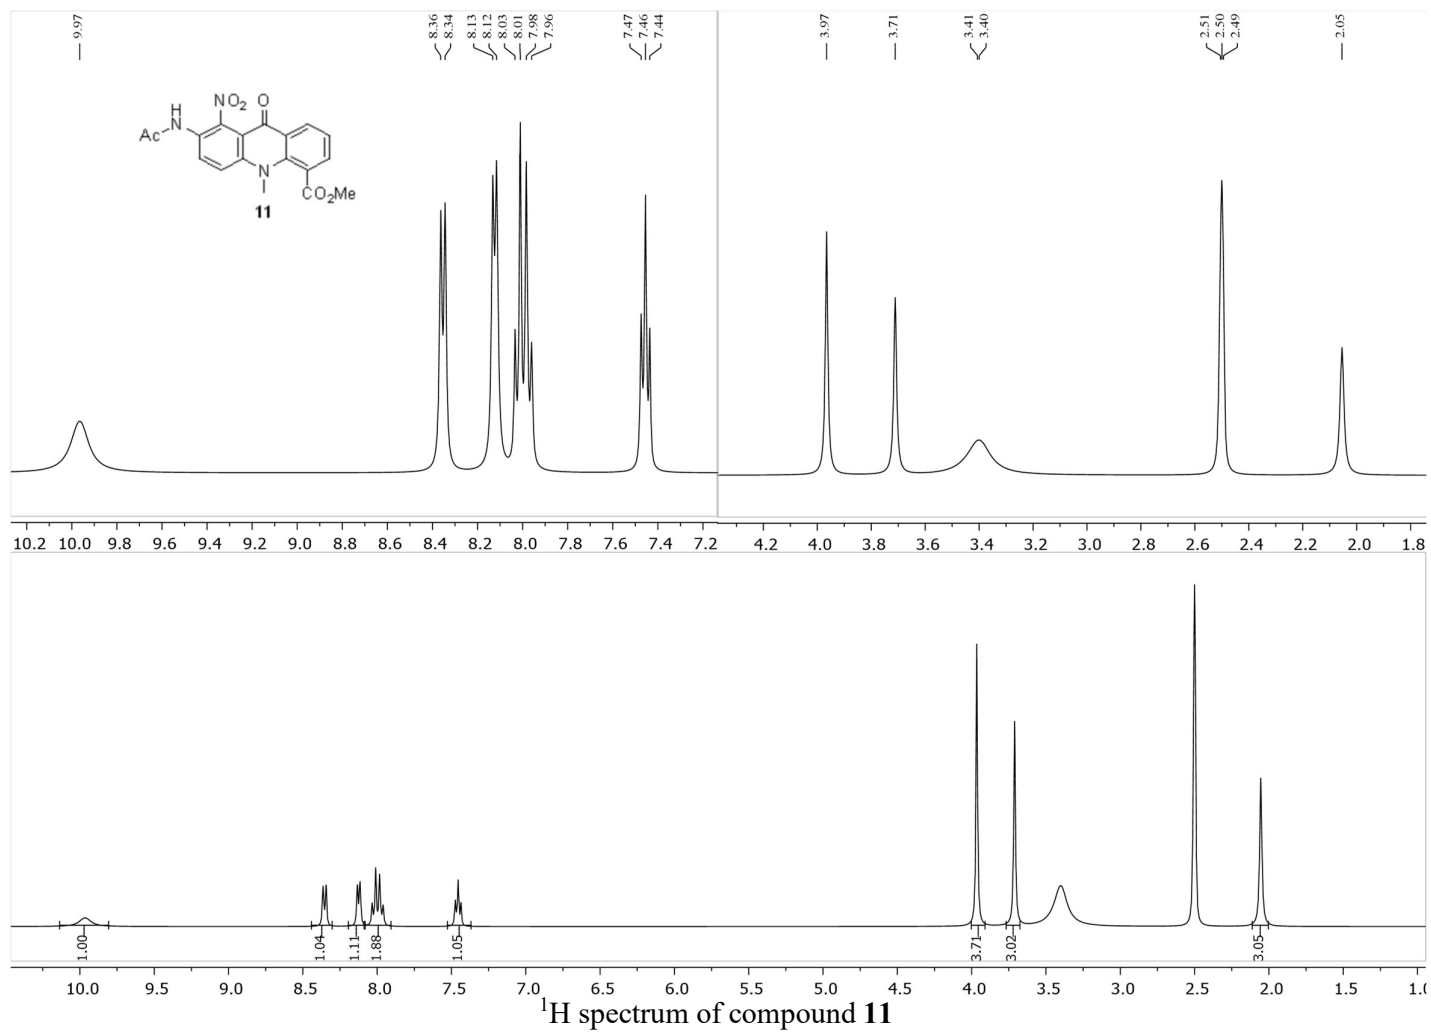

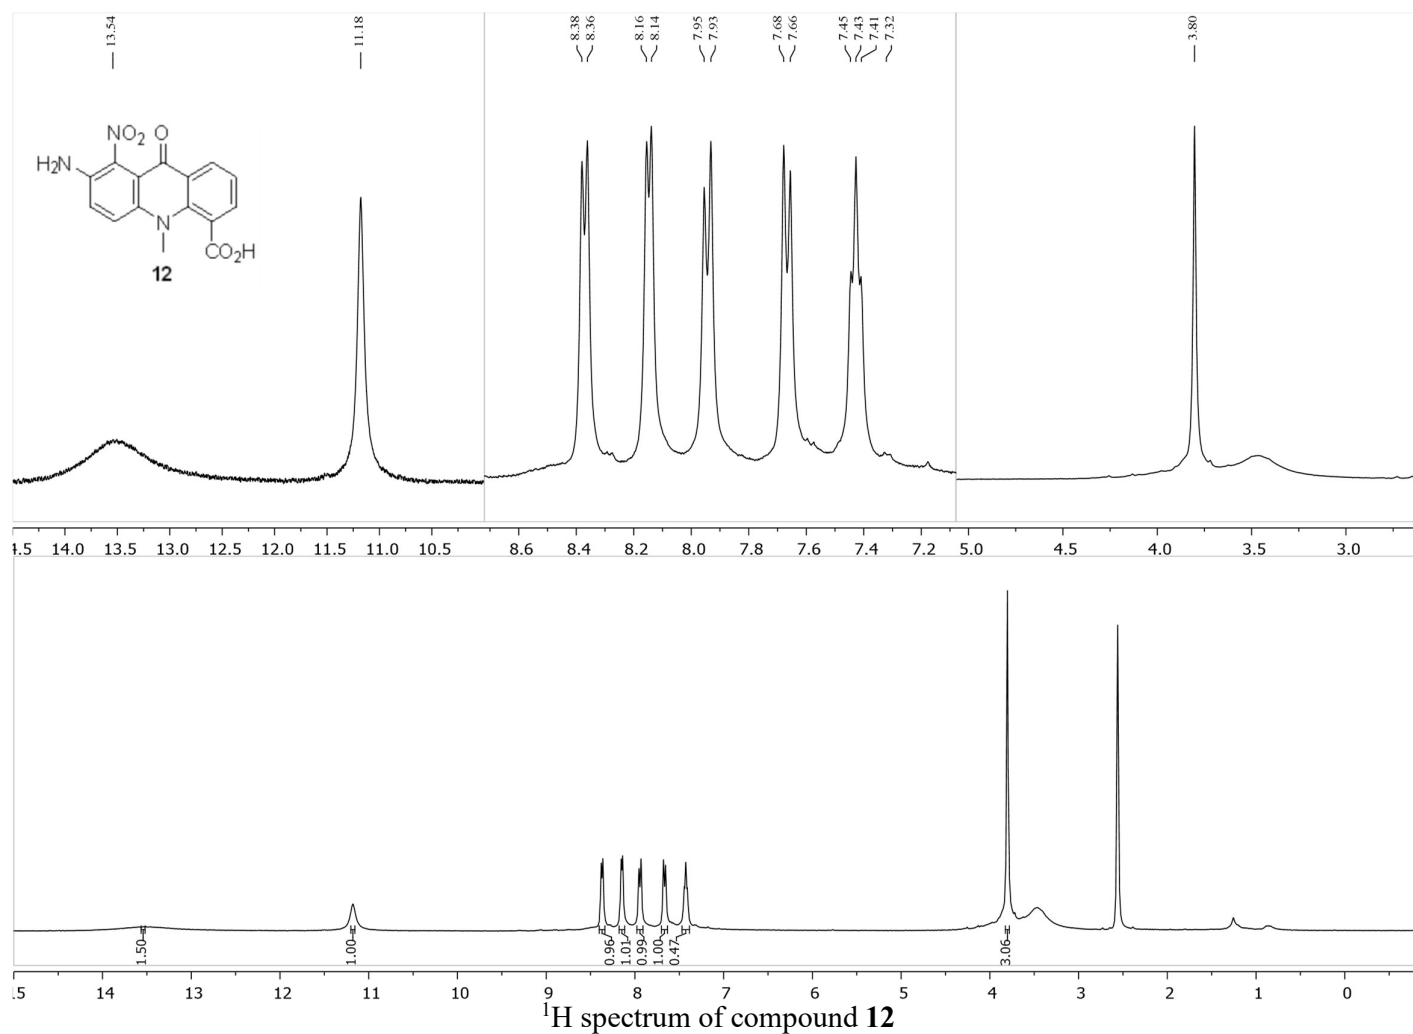

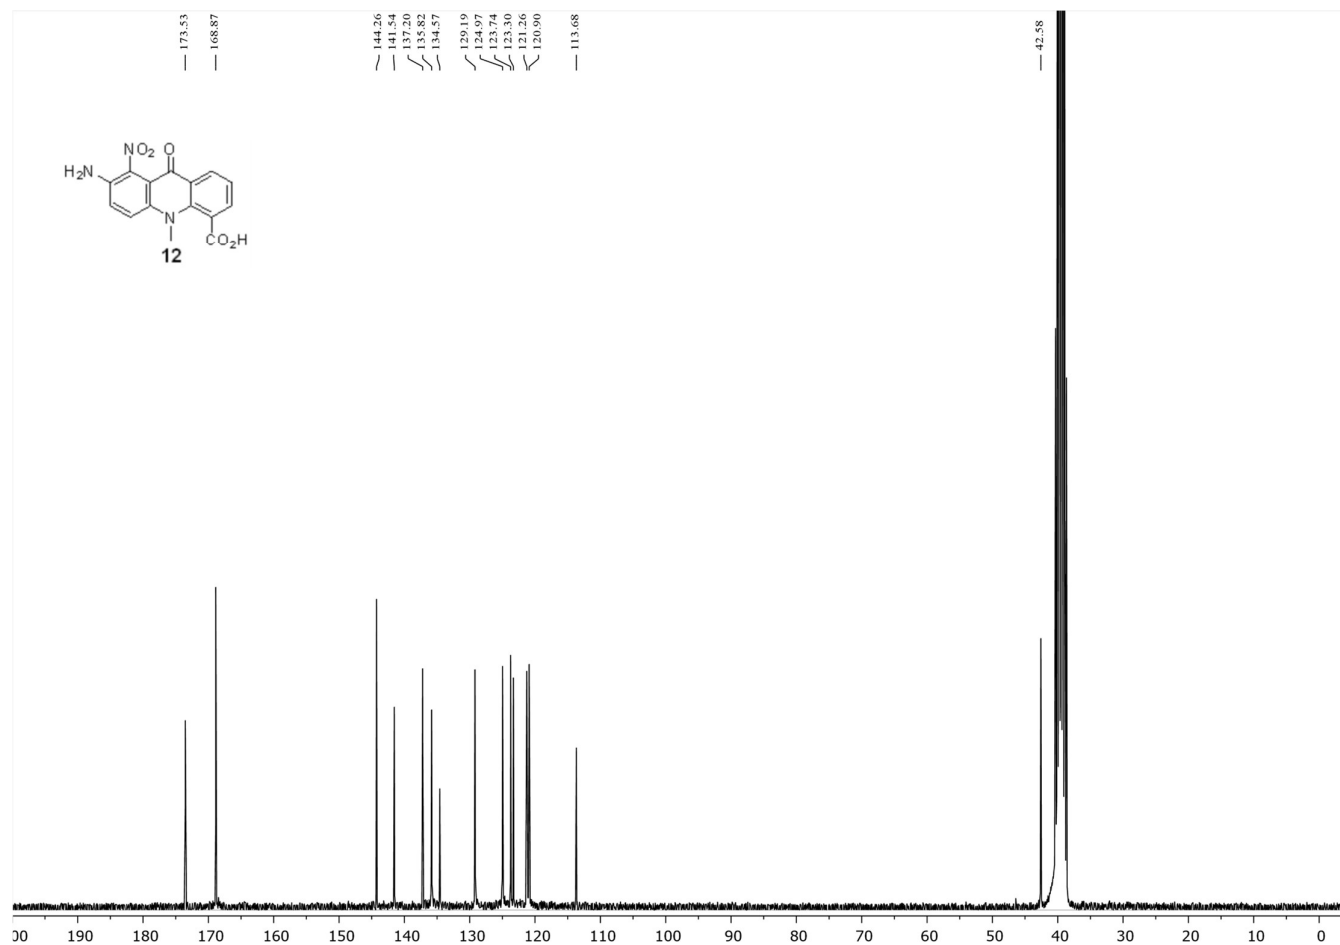

<sup>13</sup>C spectrum of compound **12**

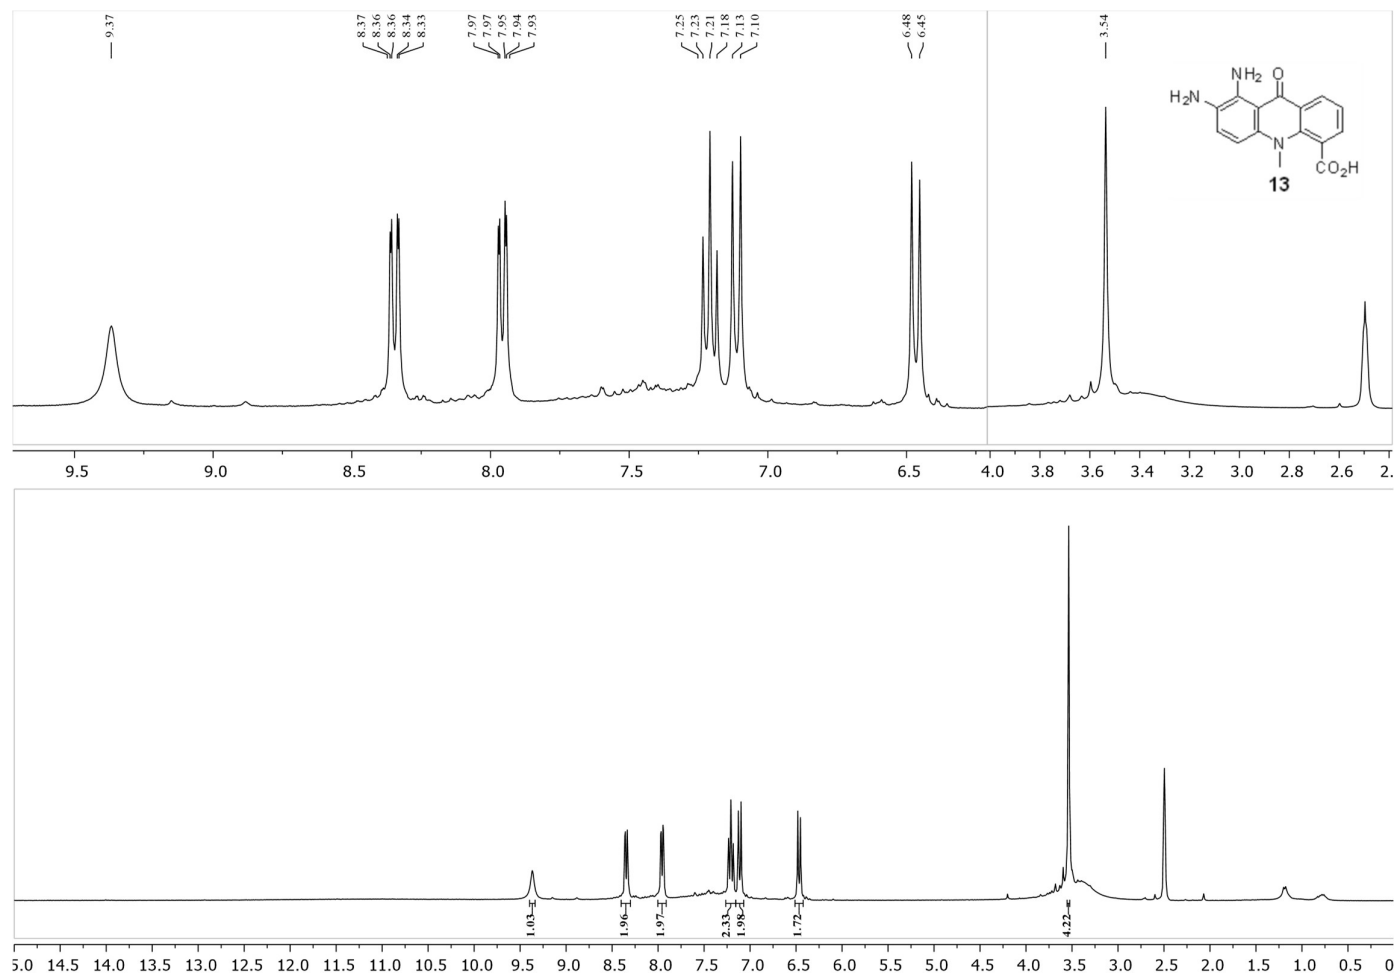

<sup>1</sup>H spectrum of compound 13

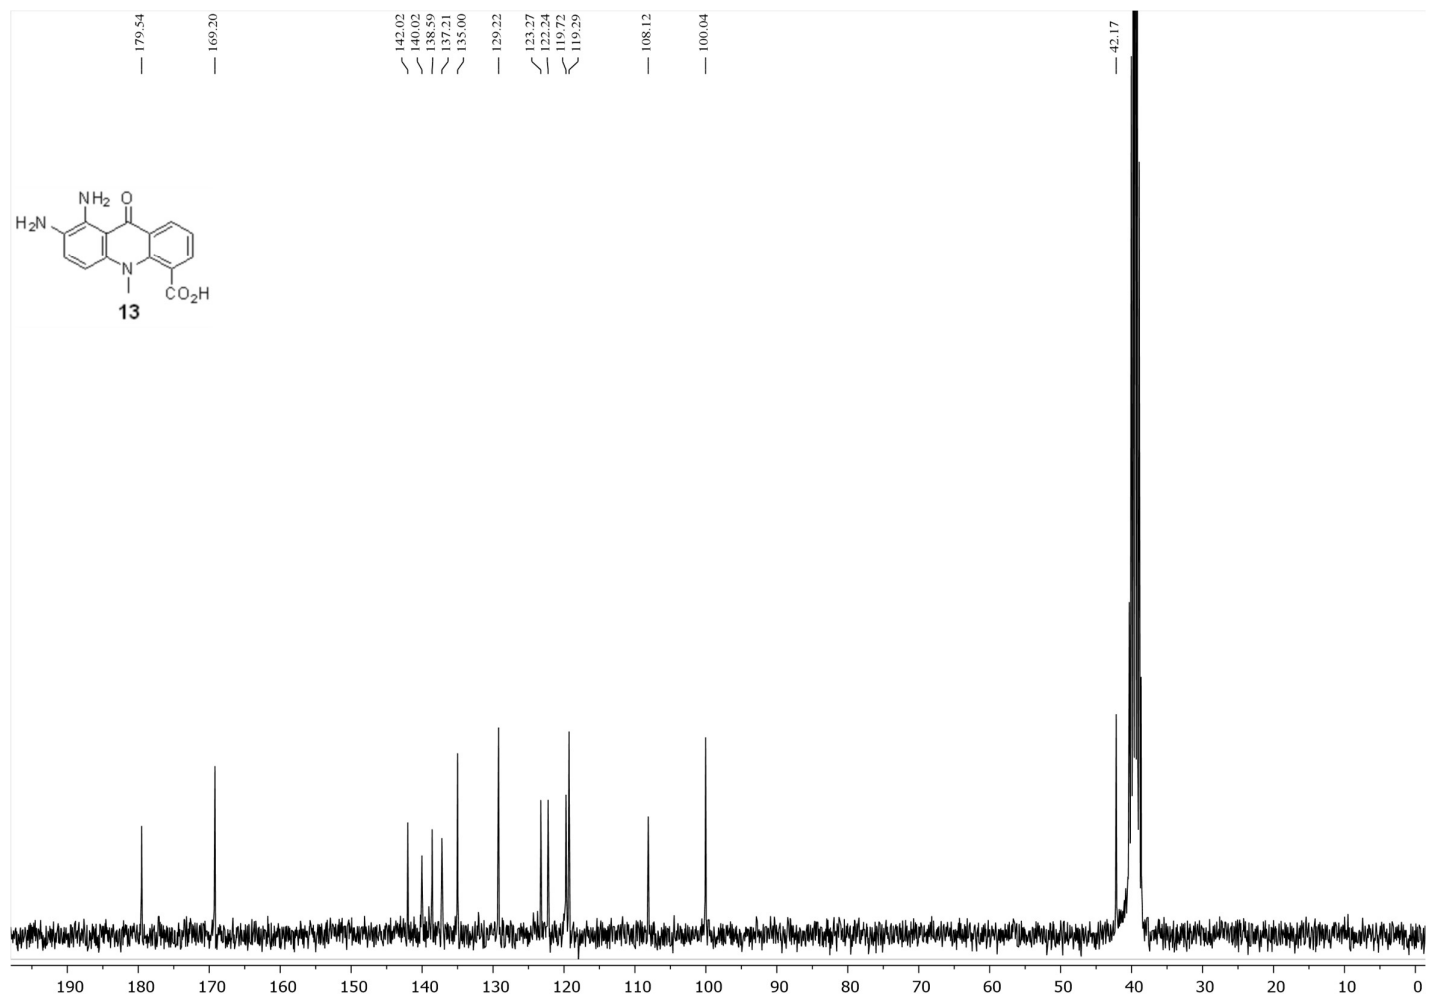

$^{13}\text{C}$  spectrum of compound **13**

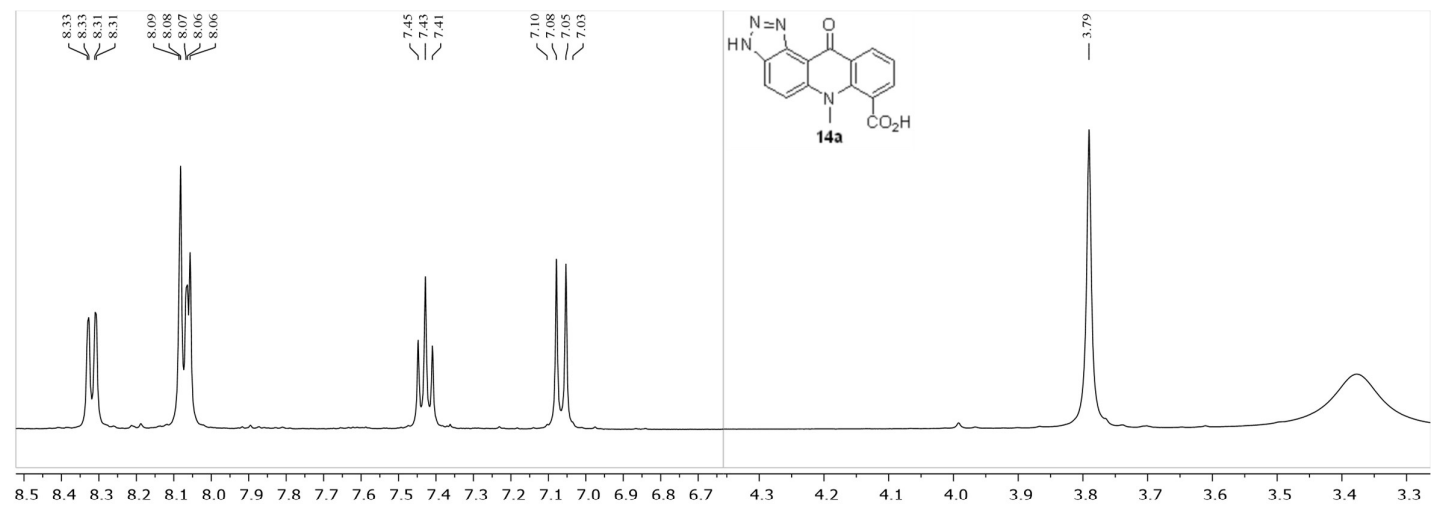

<sup>1</sup>H spectrum of compound **14a**

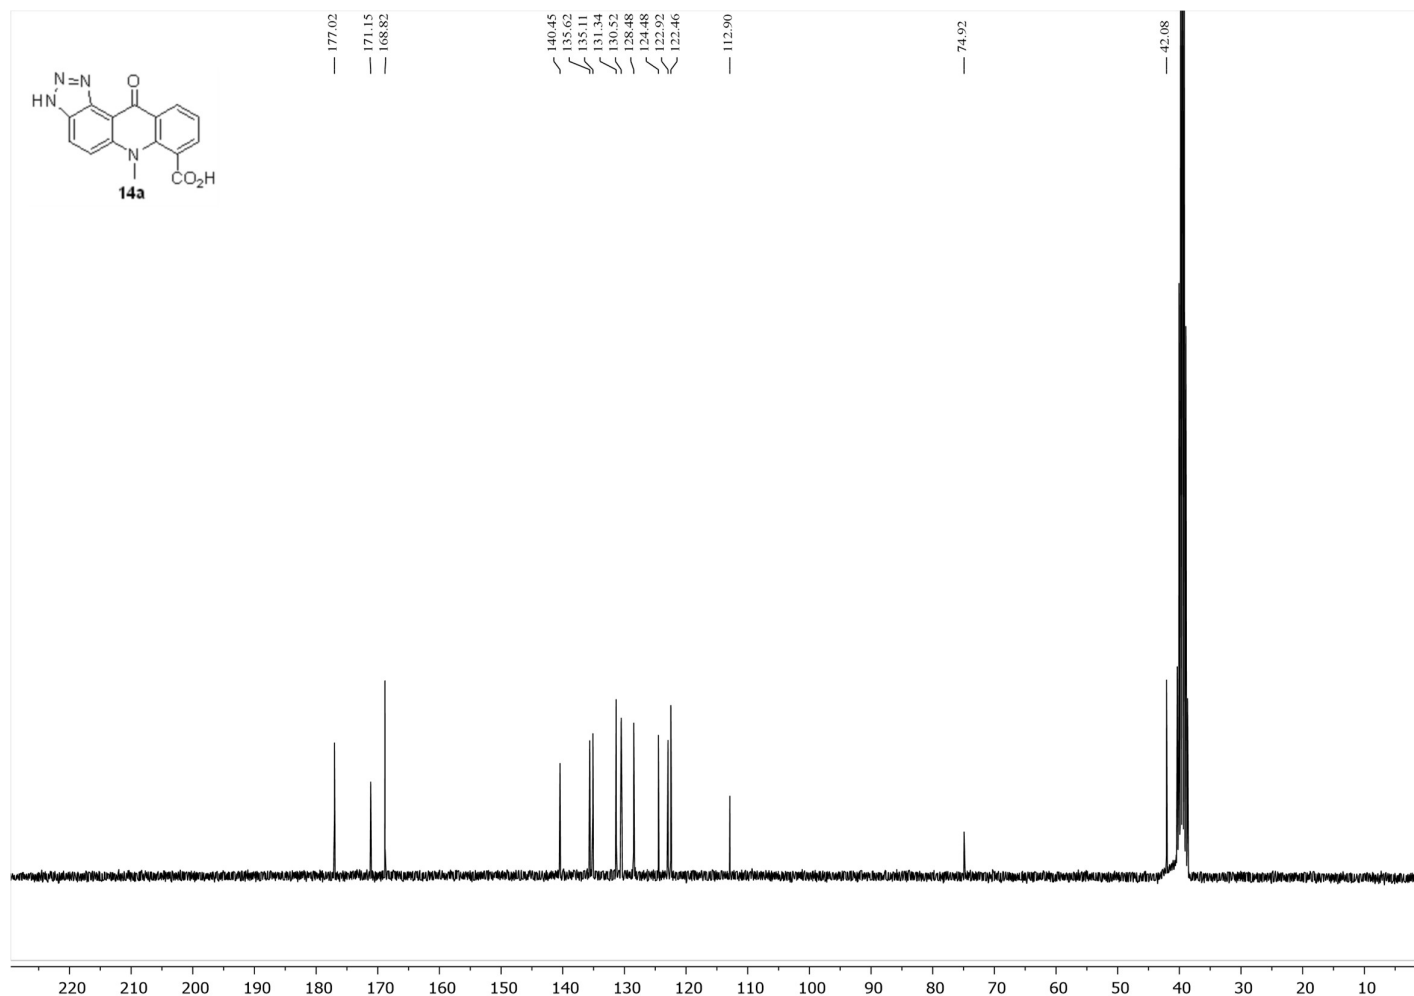

$^{13}\text{C}$  spectrum of compound **14a**

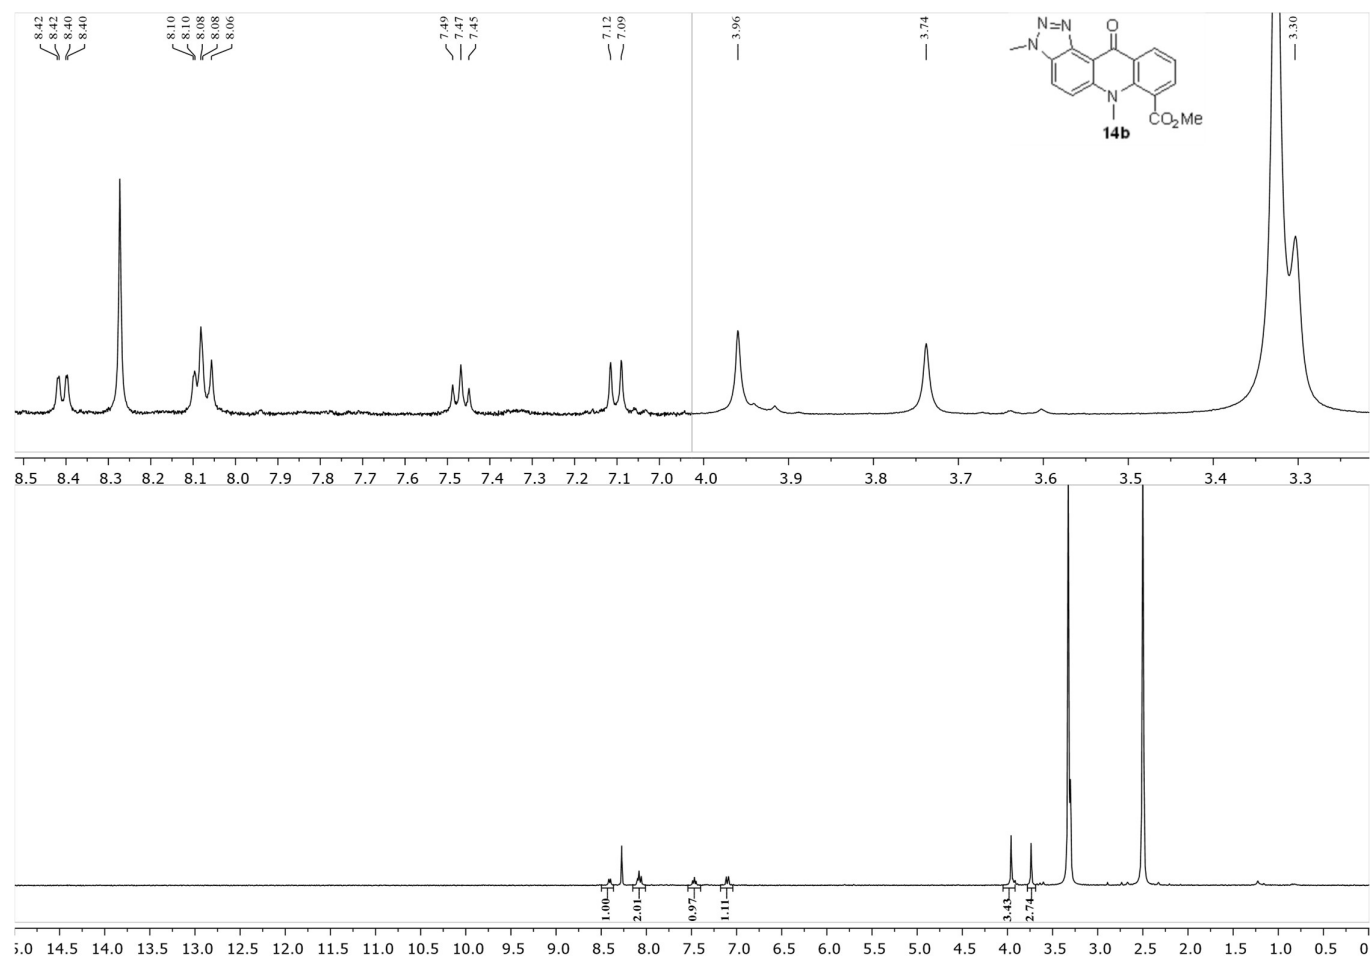

<sup>1</sup>H spectrum of compound **14b**
